# Supplementary material
Source: PubMed Central journal article supplement (PMC3958130)
Supplement: la404290c_si_002.pdf [file la404290c_si_002.pdf]

1 **Supplementary Information for**

2 **Biomimetic Magnetite Formation: From Biocombinatorial Approaches to Mineralization Effects**

3 By Jens Baumgartner, Maria Antonietta Carillo, Kevin Eckes, Peter Werner and Damien Faivre

4

5

6 **Table S1** List of oligonucleotides for gene amplification.

| Primer                         | Sequence                                 |
|--------------------------------|------------------------------------------|
| mamJ_forward                   | 5'-GACGACGACAAGATGGCAAAAACCGGCGTGAT-3'   |
| mamJ_His-Tag_reverse           | 5'-GAGGAGAAGCCCGGTTTATTCTTATCTTCAGCA-3'  |
| mtxA_forward                   | 5'-GACGACGACAAGATGAGCAGAATACTCGCAGT-3'   |
| mtxA <sub>Δ1-24</sub> _forward | 5'-GACGACGACAAGTCGGAGCCCCCGGTTTCCATGC-3' |
| mtxA_His-Tag_reverse           | 5'-GAGGAGAAGCCCGGTTGCCTTCCAAGTCT-3'      |

7

8

1 **Table S2** Summary of magnetite-adhering sequences and sequence alignment with magnetotactic  
 2 bacteria-specific proteins. Sequences marked (\*, #) originate from earlier reports by Brown et al. <sup>17a</sup> and  
 3 Barbas et al. <sup>17b</sup>, respectively. GRAVY is the grand average of hydropathy <sup>22</sup>.

| selected in this paper |       |        | reported in literature |       |        |
|------------------------|-------|--------|------------------------|-------|--------|
| Sequence               | pI    | GRAVY  | Sequence               | pI    | GRAVY  |
| AHRHPISFLSTL           | 9.81  | 0.158  | RFKRVDR <sup>#</sup>   | 12.00 | -2.300 |
| ATTHRDVQNAFR           | 9.65  | -1.125 | RRSRHH <sup>#</sup>    | 12.30 | -3.450 |
| DLKLETALSNT            | 4.37  | -0.350 | RRTVKHHN <sup>*</sup>  | 12.01 | -2.413 |
| EHLQFSTHGPLR           | 7.02  | -0.917 | RSKKMR <sup>#</sup>    | 12.02 | -2.617 |
| GTPPMSPLVSRV           | 9.75  | 0.175  | RSKRGR <sup>#</sup>    | 12.30 | -3.100 |
| GTPRSHYPAPQV           | 8.75  | -1.100 |                        |       |        |
| IPLPPSRPFFK            | 11.00 | -0.275 |                        |       |        |
| ITHPTGFLTSRP           | 9.76  | -0.258 |                        |       |        |
| KPLDIHGNNYSW           | 6.74  | -1.192 |                        |       |        |
| NDNTYANHGKIH           | 6.92  | -1.700 |                        |       |        |
| NLTSLTQGSAML           | 5.52  | 0.392  |                        |       |        |
| NMTKHPLAYTEP           | 6.75  | -1.042 |                        |       |        |
| NPFNQHLHAQHP           | 7.02  | -1.533 |                        |       |        |
| QAYRSSAFLPPM           | 8.75  | -0.167 |                        |       |        |
| QFSLPVAKLVNR           | 11.00 | 0.233  |                        |       |        |
| SGHQLLLKMPN            | 8.49  | -0.592 |                        |       |        |
| SILSTMSPHGAT           | 6.46  | 0.250  |                        |       |        |
| SPLPSHKSQHTW           | 8.51  | -1.433 |                        |       |        |
| SPTLSNDEHLRM           | 5.30  | -1.050 |                        |       |        |
| TLNKPNRALHFN           | 11.00 | -1.017 |                        |       |        |
| TSASTRPELHYP           | 6.41  | -1.092 |                        |       |        |
| TTHPSTVQTPNW           | 6.40  | -1.142 |                        |       |        |
| VPSLTPSAQSRP           | 9.72  | -0.508 |                        |       |        |
| YHEADPQAYQRT           | 5.32  | -1.917 |                        |       |        |
| YPAPQPLVTKTS           | 8.59  | -0.492 |                        |       |        |
| YSIEQEHPSPFP           | 4.51  | -1.175 |                        |       |        |
| YSPDRPWSSRY            | 8.59  | -1.933 |                        |       |        |

4

5

1

2 **Table S3** Sequence alignment of *M. gryphiswaldense* MSR-1 MamJ and phage display selected peptide

3 QFSLPVAKLVNR.

4

|              |                                                              |
|--------------|--------------------------------------------------------------|
| MamJ         | MAKNRRDRGTDLPGDGDQKISTGPEIVSVTVHPSPNLAAAAKPVQGDIWASLLESSPWSA |
| QFSLPVAKLVNR | -----                                                        |

5

|              |                                                                       |
|--------------|-----------------------------------------------------------------------|
| MamJ         | NQGGLVETAQPPSAPIRSQDPV <b>PVADLVNR</b> WSQPIWRTAPLAGNAESSEEGVVAPSLTQS |
| QFSLPVAKLVNR | ----- <b>QFSLPVAKLVNR</b> -----                                       |

6

|              |                                                                       |
|--------------|-----------------------------------------------------------------------|
| MamJ         | DSVLAVSDLVIDVQPETDAEVEVSIEPEPALVEPVIEIEAEAAEVEPEPA <b>PVADLVNR</b> WA |
| QFSLPVAKLVNR | ----- <b>QFSLPVAKLVNR</b> -----                                       |

|              |                                                              |
|--------------|--------------------------------------------------------------|
| MamJ         | QPIWRTAPLAGNAESSEEGVVAPSLTQSDSVLAVSDLVIDVQPEANAEEVVSIEPEPALV |
| QFSLPVAKLVNR | -----                                                        |

|              |                                                              |
|--------------|--------------------------------------------------------------|
| MamJ         | EPVIEIEAEAAEVEPEPAPVEPAIEIEAIRVELEPVLIDEVVELVTEFEYSQAESVASAD |
| QFSLPVAKLVNR | -----                                                        |

|              |                                                             |
|--------------|-------------------------------------------------------------|
| MamJ         | LIANPAPAESSRLAELLDEAAAIAAPAVAVAVEATRQPNKITASVKKRAPVQEVVEDLL |
| QFSLPVAKLVNR | -----                                                       |

|              |                                                               |
|--------------|---------------------------------------------------------------|
| MamJ         | GGIFGVAGSAVRGVFTIGGGFVDGVVKGGRLVGNSNVVAGTRRLAQTIEVSCGSCSSPKCD |
| QFSLPVAKLVNR | -----                                                         |

|              |        |
|--------------|--------|
| MamJ         | AEDKNK |
| QFSLPVAKLVNR | -----  |

**Table S4** Sequence alignment of *M. gryphiswaldense* MSR-1 MtxA and phage display selected peptide

VPSLTPSAQSRLP. Truncated N-terminal signal peptide is marked by italics.

|                       |                                                                                                                                                               |
|-----------------------|---------------------------------------------------------------------------------------------------------------------------------------------------------------|
| MtxA<br>VPSLTPSAQSRLP | <i>MSRILAV</i> <b>LAAGLMMM</b> <i>GW</i> TQAVQASEPPVSMLMQVAGAVETSKGGEKWAPVTRNKFLFVG<br>-----                                                                  |
| MtxA<br>VPSLTPSAQSRLP | TQVRTGADGGGKLIDQNSGMAQTIGANSVVEITAAGPKAVSGSLSAPEAASGDLVAGLSN<br>-----                                                                                         |
| MtxA<br>VPSLTPSAQSRLP | RFAEAQRYTTVRRSVKKEAADLKLRLVASDITLSPTYPDLVWENMGAQYGYTLVIDGTSHA<br>-----                                                                                        |
| MtxA<br>VPSLTPSAQSRLP | VPATSGEMVRFRR <b>VPSLT</b> <b>PGAHS</b> FGVTVTEGGQAVGQTEKGGTIVWLSATEDKALVDGVAR<br>----- <b>VPSLT</b> <b>PGAHS</b> FGVTVTEGGQAVGQTEKGGTIVWLSATEDKALVDGVAR----- |
| MtxA<br>VPSLTPSAQSRLP | VKAASTGDEFALGNYLDSKGVTVAAAMDAYRKHFASHKDDNDMRPLLIKTYNDLKLRLDLRQ<br>-----                                                                                       |
| MtxA<br>VPSLTPSAQSRLP | KEALVYNEQLEGN<br>-----                                                                                                                                        |



- 1 **Table S5** Fitted kinetic data assuming linear relation reaction-limited growth. Data was obtained from
- 2 three independent experiments except for data marked (\*) that refer to single experiments. (#) refers to
- 3 only two data points.

| Additive                                 | Critical Size $D_0$ | Kinetic rate $k$ ( $10^{-2}$ nm min $^{-1}$ ) | $R^2$ |
|------------------------------------------|---------------------|-----------------------------------------------|-------|
| none                                     | $23.0 \pm 1.5$      | $3.4 \pm 0.5$                                 | 0.896 |
| MtxA $_{\Delta 1-24}$ 0.01 mg mL $^{-1}$ | $30.9 \pm 0.5$      | $1.3 \pm 0.2$                                 | 0.917 |
| MtxA $_{\Delta 1-24}$ 0.1 mg mL $^{-1}$  | $4.9 \pm 1.5(*)$    | $3.7 \pm 0.4(*)$                              | 0.981 |
| PolyR 0.01 mg mL $^{-1}$                 | $12.9 \pm 0.8$      | $3.8 \pm 0.3$                                 | 0.975 |
| PolyR 0.1 mg mL $^{-1}$                  | $10.5 \pm 1.4$      | $2.2 \pm 0.1$                                 | 0.997 |
| MamJ 0.01 mg mL $^{-1}$                  | $13.8 \pm 2.0$      | $3.6 \pm 0.7$                                 | 0.926 |
| PolyE 0.01 mg mL $^{-1}$                 | $15.3 \pm 1.3$      | $2.4 \pm 0.5$                                 | 0.926 |
| PolyE 0.1 mg mL $^{-1}$                  | 4.3(#)              | 1.8(#)                                        | 1     |

4

5

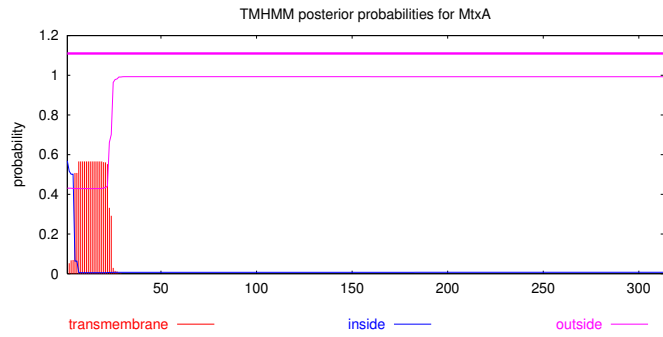

1

2 **Figure S1** TMHMM output from MtxA sequence. The program predicts an N-terminal transmembrane  
 3 stretch of 24 amino acids with a probability of  $\sim 0.5$  and a protein location outside the cytosol.

4

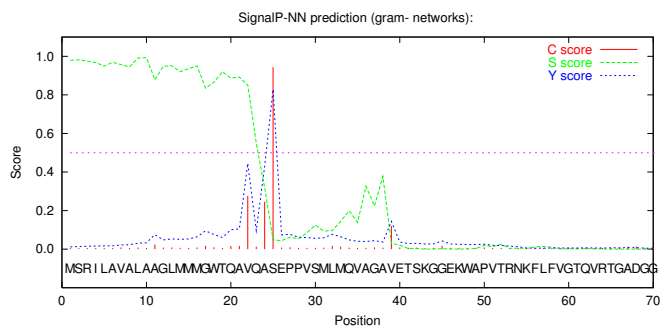

5

6 **Figure S2** SignalP-NN output for MtxA sequence. C score indicates cleavage probability.

7

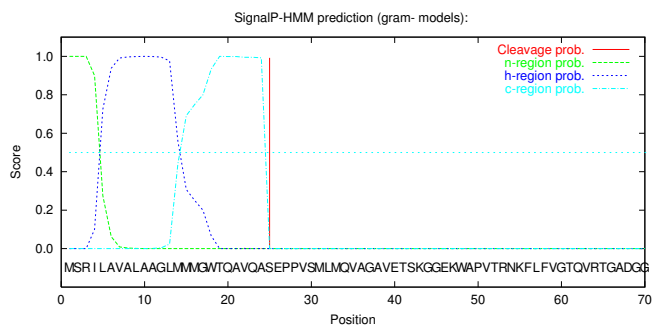

8

9 **Figure S3** SignalP-HMM output for MtxA sequence. Cleavage site is indicated by red line.

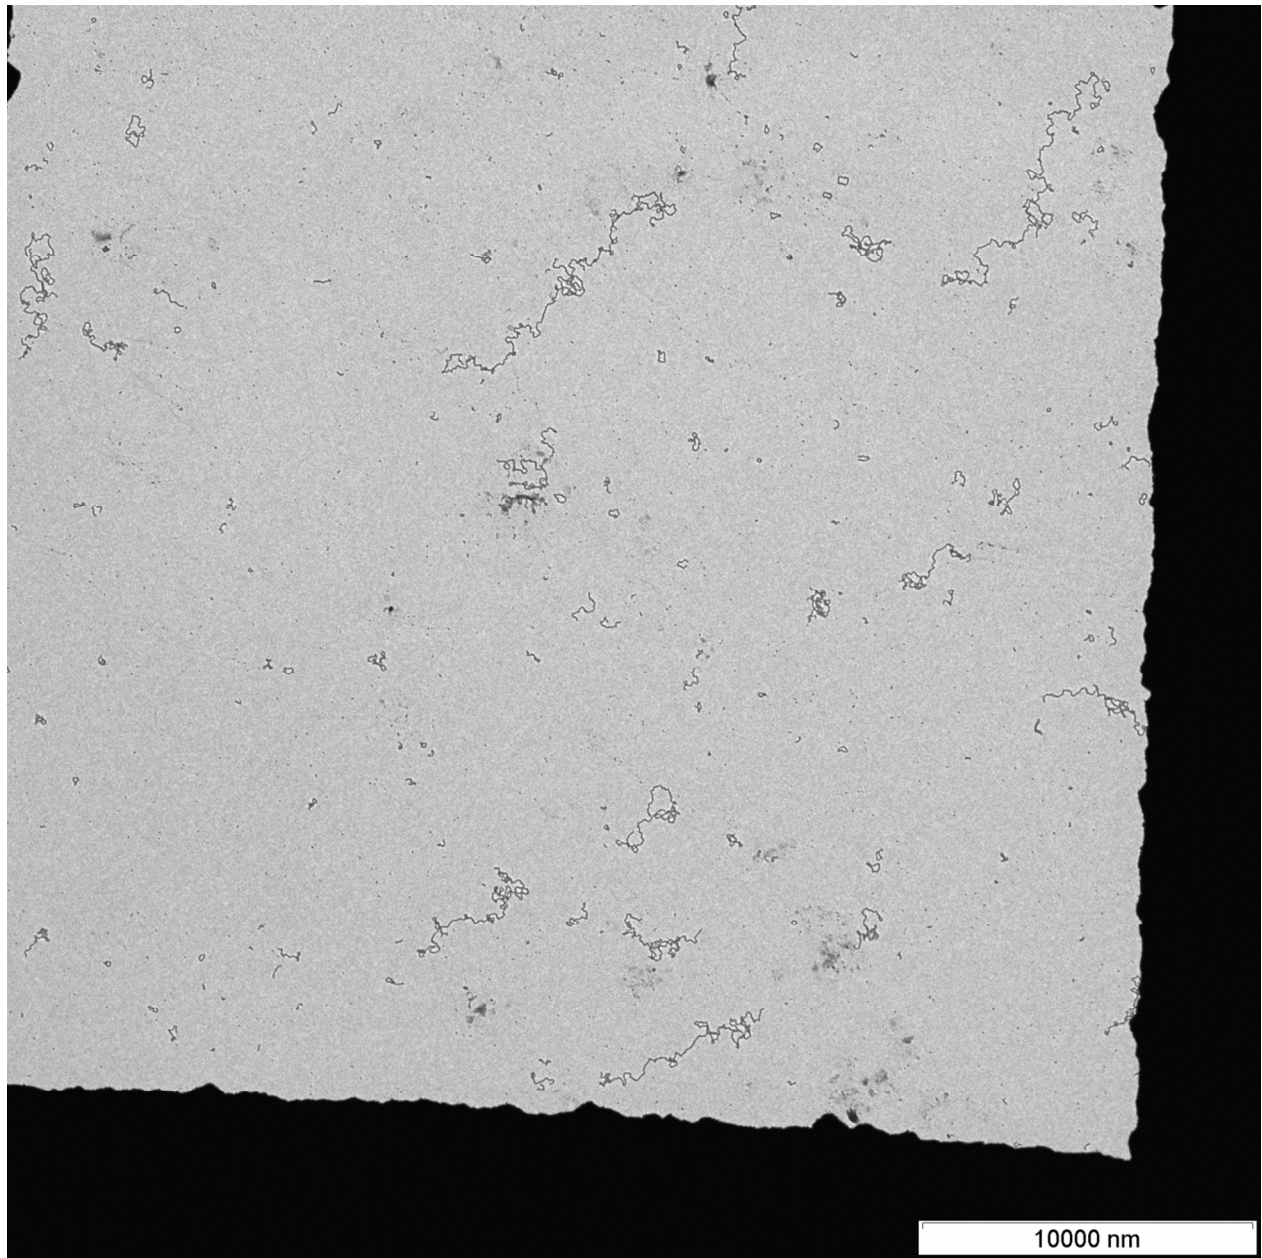

1

2 **Figure S4** Large field of view transmission electron micrograph of magnetite particles formed in the  
3 presence of poly-L-arginine.

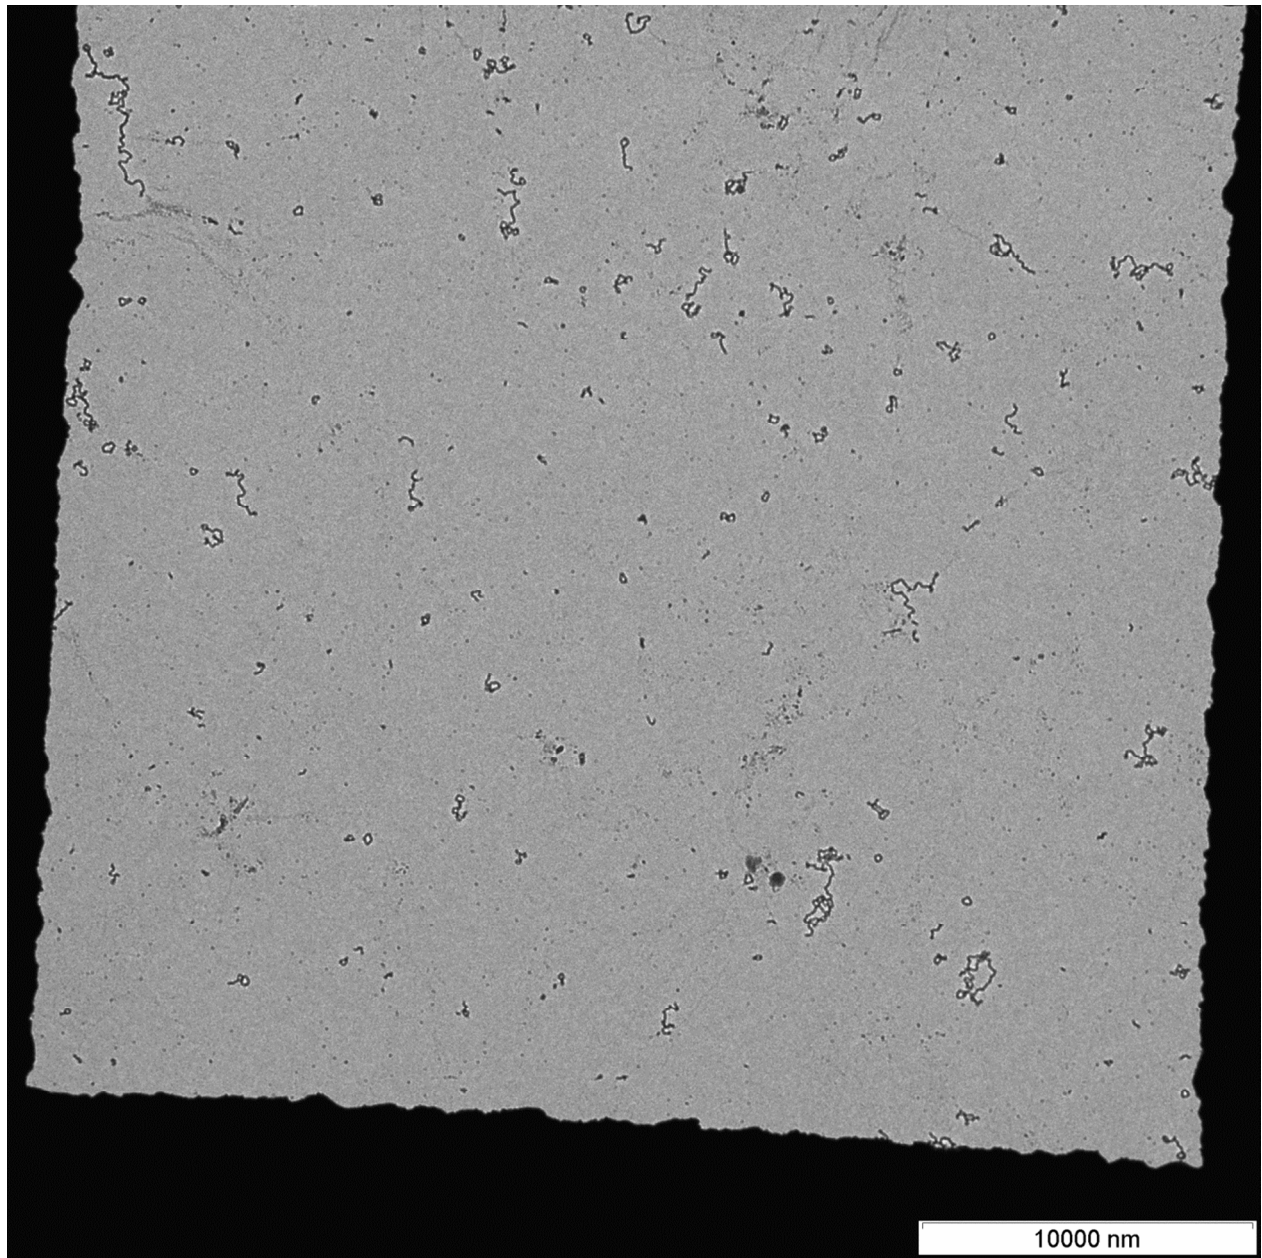

1

2 **Figure S5** Large field of view transmission electron micrograph of magnetite particles formed in the  
3 presence of poly-L-arginine.

4

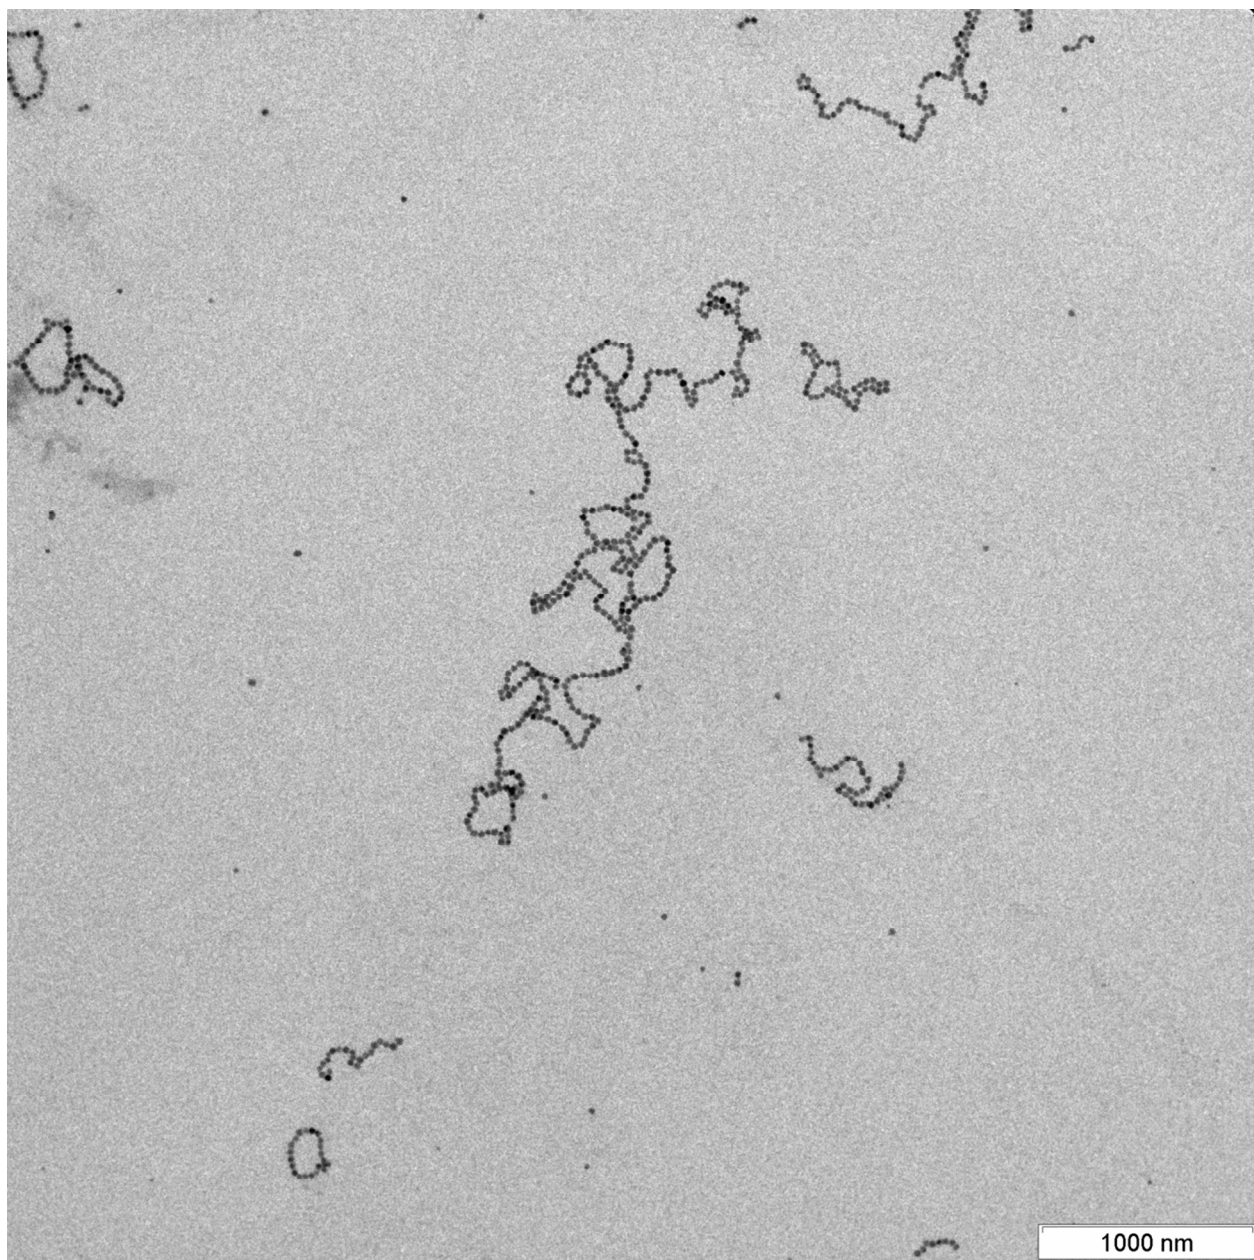

1

2 **Figure S6** Medium field of view transmission electron micrograph of magnetite particles formed in the  
3 presence of poly-L-arginine.

4
